# Supplementary material for: Inheritance of Summer Dormancy, Persistence and Productivity Using Half-sib Matting in Tall Fescue&nbsp;
Source: Research Square preprint supplement (doi:10.21203/rs.3.rs-120591/v1), 2020-12-08
Supplement: Supplementary file 1 [file 74cb57bb80541cf5df700022.docx]

| **Table S1** Analysis of variance for agro-morphological traits and summer dormancy index in parental genotypes (G) and half-sib families (F) of tall fescue assessed during four years (2016-2019) | | | | | | | | | | |
| --- | --- | --- | --- | --- | --- | --- | --- | --- | --- | --- |
| Mean square | | | | | | | | | | |
| SDI | FLO | NS | CD | PH | ADFY | AUDFY | SUDFY | SPDFY | Degree of freedom | Source of variation |
| **Parental genotypes** | | | | | | | | | | |
| 0.92ns | 4.58ns | 32.78ns | 14.76ns | 314.95** | 375050.59** | 8845.93* | 16864.85* | 107278.88** | 2 | Rep |
| 5.04** | 81.55** | 2868.00** | 88.29** | 309.17** | 20350.61** | 5378.65** | 19528.58** | 40800.20** | 15 | G |
| 1.15 | 8.91 | 102.16 | 7.29 | 52.24 | 7580.08 | 1593.43 | 4130.76 | 20800.65 | 30 | Rep (G) |
| 15.68** | 3208.37** | 81931.23** | 3023.32** | 5422.46** | 268154.52** | 280209.88** | 320142.49** | 1455050.26** | 3 | Y |
| 13.00* | 53.54** | 1414.82** | 11.43** | 66.63** | 4541.39** | 2465.00** | 2765.03** | 12654.14* | 45 | Y × G |
| 12.00* | 7.00ns | 132.60ns | 47.15** | 564.99** | 13249.33** | 5350.44** | 6471.39** | 30992.44** | 6 | Rep × Y |
| 2.02 | 7.84 | 417.40 | 2.59 | 23.49 | 2335.57 | 822.68 | 1283.31 | 7310.32 | 90 | Error |
| **Half-sib families** | | | | | | | | | | |
| 4.45** | 19.19ns | 3098.73** | 126.55** | 748.50** | 25307.87ns | 19901.27** | 9856.03** | 24162.21** | 2 | Rep |
| 3.12** | 130.20* | 3990.97** | 75.19** | 451.59** | 56688.69** | 9174.76** | 9482.56** | 18393.00** | 15 | F |
| 0.30 | 30.60 | 507.90 | 10.19 | 16.63 | 17773.69 | 1313.19 | 1917.85 | 4945.77 | 30 | Rep (F) |
| 41.03** | 3225.74** | 229539.17** | 4982.63** | 2377.15** | 4244153.74** | 318203.76** | 142245.19** | 1378884.31** | 3 | Y |
| 1.00** | 46.99* | 1185.47** | 12.52** | 142.33** | 19350.39* | 4158.00** | 3477.41** | 9028.29** | 45 | Y × F |
| 1.62** | 20.95ns | 2630.92** | 37.51** | 295.14** | 26771.99** | 31295.53** | 11486.82** | 23886.31** | 6 | Rep × Y |
| 0.15 | 25.65 | 434.09 | 2.76 | 15.35 | 10850.21 | 830.86 | 931.31 | 4779.09 | 90 | Error |
| *: Significant at the 0.05 probability level, **: Significant at the 0.01 probability level, ns: non-significant.  Rep: replication, Y: year, G: parental genotypes, F: half-sib families  SPDFY: spring dry forage yield, SUDFY: summer dry forage yield, AUDFY: autumn dry forage yield, ADFY: annual dry forage yield, PH: plant height, CD: crown diameter, NS: number of stems per plant, FLO: flowering time, SDI: summer dormancy index (summer yield of dormant control cultivar/summer yield) | | | | | | | | | | |

| **Table S2** General combining ability (GCA) of measured traits in tall fescue genotypes | | | | | | | | |
| --- | --- | --- | --- | --- | --- | --- | --- | --- |
| Genotypes | ADFY | PH | CD | NS | FLO | SDI | Persis |
| 21M | 261.60 | 15.82 | 7.45 | 14.00 | 6.90 | -2.12 | 18.75 |
| 20L | 86.80 | 11.67 | 4.45 | 10.52 | 3.99 | -1.29 | -178.38 |
| 14E | 11.08 | 6.22 | -1.01 | 2.06 | 2.07 | -0.89 | -271.21 |
| 23M | -10.36 | 6.14 | -1.93 | 5.36 | 2.99 | -0.66 | -31.63 |
| 6L | -121.34 | -7.94 | -4.73 | -8.98 | -1.09 | 0.99 | 43.34 |
| 3M | -42.95 | -8.95 | -1.99 | -2.37 | 2.45 | -0.11 | 108.55 |
| 22M | -22.13 | 8.26 | 2.29 | -4.55 | -3.97 | -0.43 | 18.73 |
| 12L | 59.37 | 2.06 | 1.57 | 9.30 | 7.86 | -0.98 | -95.38 |
| 9E | -105.03 | -3.32 | -0.90 | 1.01 | 2.10 | 0.21 | -65.36 |
| 11M | 157.83 | 13.12 | 5.50 | 12.50 | 5.20 | -1.61 | -266.93 |
| 3E | -35.57 | -1.36 | -0.35 | -11.50 | 2.14 | -0.24 | 92.60 |
| 1M | -123.90 | -10.31 | -2.05 | 0.88 | 1.06 | 1.65 | 71.20 |
| 10E | -2.91 | -3.32 | -0.47 | -4.18 | -3.11 | -0.34 | -16.59 |
| 1E | 310.87 | 22.45 | 9.73 | 16.48 | -1.51 | -2.14 | 10.90 |
| 17M | -203.65 | -15.22 | -6.09 | -22.19 | -12.90 | 3.58 | 228.88 |
| 4E | -219.55 | -14.51 | -5.30 | -22.71 | -10.12 | 4.56 | 332.70 |
| LSD | 49.98 | 1.97 | 0.83 | 2.14 | 1.01 | 0.50 | 24.11 |
| ADFY: annual dry forage yield,, PH: plant height, CD: crown diameter, NS: number of stems per plant, FLO: flowering time, SDI: summer dormancy index (summer yield of dormant control cultivar/summer yield) Persis: persistence | | | | | | | | |

| **Table S3** Correlation coefficients among traits in parental genotypes (above diagonal) and half sib families of tall fescue (below diagonal) | | | | | | | | | | |
| --- | --- | --- | --- | --- | --- | --- | --- | --- | --- | --- |
|  | SPDFY | SUDFY | AUDFY | ADFY | PH | CD | NS | FLO | SDI | Persis |
| SPDFY | 1 | 0.92** | 0.94** | 0.97** | 0.82** | 0.84** | 0.82** | 0.21ns | -0.90** | 0.89** |
| SUDFY | 0.97** | 1 | 0.97** | 0.98** | 0.89** | 0.74** | 0.75** | 0.28ns | -0.92** | 0.53* |
| AUDFY | 0.96** | 0.98** | 1 | 0.99** | 0.88** | 0.75** | 0.77** | 0.32ns | -0.92** | 0.76** |
| ADFY | 0.98** | 0.99** | 0.99** | 1 | 0.88** | 0.79** | 0.79** | 0.28ns | -0.93** | 0.72** |
| PH | 0.89** | 0.93** | 0.91** | 0.92** | 1 | 0.83** | 0.75** | 0.18ns | -0.86** | 0.52* |
| CD | 0.90** | 0.94** | 0.94** | 0.95** | 0.94** | 1 | 0.77** | 0.03ns | -0.78** | 0.50* |
| NS | 0.91** | 0.95** | 0.88** | 0.91** | 0.87** | 0.89** | 1 | 0.13ns | -0.76** | 0.50* |
| FLO | 0.44ns | 0.41ns | 0.37ns | 0.41ns | 0.34ns | 0.33ns | 0.58** | 1 | -0.29ns | -0.41ns |
| SDI | -0.88** | -0.88** | -0.84** | -0.87** | -0.91** | -0.81** | -0.86** | -0.51* | 1 | -0.38ns |
| Persis | 0.10ns | -0.12ns | 0.11ns | 0.12ns | -0.21ns | -0.06ns | -0.23ns | -0.50* | 0.50* | 1 |
| SPDFY: spring dry forage yield, SUDFY: summer dry forage yield, AUDFY: autumn dry forage yield, ADFY: annual dry forage yield, PH: plant height, CD: crown diameter, NS: number of stems per plant, FLO: flowering time, SDI: summer dormancy index, Persis: persistence  ns: non-significant, *: and ** Significant at 5 and 1 % level of level probability, respectively | | | | | | | | | | |
